# Supplementary material for: Relationship between physical and cognitive performance in community dwelling, ethnically diverse older adults: a cross-sectional study
Source: PeerJ. 2019 Jan 7;7:e6159. doi: 10.7717/peerj.6159 (PMC6327882; doi:10.7717/peerj.6159)
Supplement: Data S1 — Medication legend 0: none. 1: betablockers. 2:statin. 3: vasodilators. 4: calcium channel blockers 5: other Ethnicity legend 1: white. 2: Asian. 3: African American. 4: Other [file peerj-07-6159-s001.xls]

## Sheet: TMTB
logY_trailB	age	education_class	Max__recorded_HR_during_6MWT__bp	_6MWT_m
5.03565	91	1	109	415.87
5.05625	83	0	112	415.87
4.80271	91	0	99	399.875
4.06044	76	1	105	374.74
4.34381	63	0	88	319.9
4.85203	75	0	109	485.334
3.97029	88	1	127	414.042
5.01064	95	0	85	374.74
4.04585	71	0	115	450.145
4.85203	88	0	87	406.73
5.63479	74	0	122	534.69
4.94164	88	0	89	287.91
4.66344	66	1	152	536.061
4.67283	91	0	103	297.05
4.85203	72	0	142	520.98
5.63479	78	0	103	439.634
4.06079	76	1	148	470.71
4.86599	77	0	88	548.4
4.31749	70	0	110	462.484
4.39445	69	0	97	285.168
4.44265	85	1	97	313.045
4.38203	71	0	119	462.484
3.91202	73	1	112	511.84
3.91621	61	1	119	413.128
3.7612	64	1	110	437.806
4.45435	73	1	120	558.911
4.89784	73	1	100	427.112
4.77912	73	1	121	514.125
5.04986	73	0	120	443.29
5.19296	79	0	83	374.74
3.99673	91	1	138	260.49
4.49981	87	1	120	443.29
4.15888	93	0	129	333.61
3.91999	61	1	148	543.83
3.55535	62	0	146	554.798
3.85841	66	0	162	578.562
4.2485	60	1	151	577.648
4.09434	81	0	130	468.882
5.04343	66	0	106	367.126
4.58497	77	0	122	523.265
4.27667	61	0	130	543.83
4.11087	61	0	127	506.356
4.58292	65	1	133	460.656
5.53339	74	1	113	477.839
3.68888	63	1	149	572.164
4.78999	80	0	103	489.904
4.88583	82	0	85	279.684
4.20469	64	1	115	504.528
4.09434	70	1	144	550.776
4.38203	77	1	135	505.99
4.45435	66	1	133	504.528
4.54329	80	1	139	560.282
4.33073	71	1	99	554.798
4.45435	77	1	108	320.814
4.54329	70	1	117	482.592
3.66356	64	1	134	464.221
4.01746	70	1	145	525.55
5.56114	81	0	99	411.3
3.80666	67	1	158	571.25
3.79549	79	1	136	587.428
4.07754	69	0	109	558.728
4.78749	70	1	96	555.712
3.98898	82	0	102	440.091
4.27667	67	0	147	467.968
5.37064	78	0	100	419.215
4.55388	70	1	107	553.884
4.35671	63	1	127	550.228
3.80444	61	1	121	572.621
3.71357	72	1	133	531.034
3.7612	60	0	106	594.214
4.15888	62	1	108	548.4
4.34381	66	1	150	552.97
4.27667	69	1	135	549.314
3.66356	75	1	84	548.4
5.03044	76	0	96	371.998
4.77068	76	0	138	354.33
4.04305	84	0	122	388.45
4.91998	78	0	108	308.932
4.44512	84	0	108	255.006
4.90993	81	0	123	390.735
4.35671	81	0	90	386.924
4.04305	84	1	90	332.084
4.84419	93	0	109	389.912
5.29832	90	0	93	333.61
4.33073	89	1	86	390.278
4.23411	86	0	89	363.498
4.7193	88	0	106	332.394
4.36945	71	1	115	473.452

## Sheet: TMTA
logY_trailA	age	Max__recorded_HR_during_6MWT__bp	_6MWT_m	PASE
3.55019	91	109	415.87	208
3.80666	83	112	415.87	167
3.41871	91	99	399.875	182
3.89182	76	105	374.74	121
3.28091	63	88	319.9	108
3.71113	75	109	485.334	141
3.3322	88	127	414.042	125
4.49981	95	85	374.74	84
2.95178	71	115	450.145	232.76
3.71357	88	87	406.73	168.4
3.43399	74	122	534.69	172
3.63759	88	89	287.91	51
3.21888	66	152	536.061	235
3.93183	91	103	297.05	106
4.06044	72	142	520.98	226.33
4.78749	78	103	439.634	173
3.28091	76	148	470.71	233
3.10009	77	88	548.4	136
3.09919	70	110	462.484	149.03
3.63548	69	97	285.168	93
3.21888	85	97	313.045	204
3.71357	71	119	462.484	350.63
3.13549	73	112	511.84	131.8
3.84096	61	119	413.128	126.73
3.4012	64	110	437.806	118.7
3.73767	73	120	558.911	234.37
3.49651	73	100	427.112	75.12
3.52636	73	121	514.125	41.1
3.73266	73	120	443.29	133.9
4.00733	79	83	374.74	195.65
3.61092	91	138	260.49	38.25
2.83321	87	120	443.29	325.7
3.3673	93	129	333.61	61.1
3.43399	61	148	543.83	139.25
3.04452	62	146	554.798	277.01
3.41838	66	162	578.562	147.81
3.2581	60	151	577.648	33.6
3.3673	81	130	468.882	151.71
3.82864	66	106	367.126	83.46
3.4012	77	122	523.265	244.99
3.43399	61	130	543.83	226.94
3.1307	61	127	506.356	138.5
3.1394	65	133	460.656	330.151
3.97029	74	113	477.839	63.7
2.89037	63	149	572.164	212.85
3.64675	80	103	489.904	228.32
4.05178	82	85	279.684	110.7
3.79324	64	115	504.528	85.8
3.46574	70	144	550.776	199.19
2.99573	77	135	505.99	210.48
3.4012	66	133	504.528	131.06
3.80888	80	139	560.282	168.12
3.17805	71	99	554.798	131.52
3.68888	77	108	320.814	157.25
3.77046	70	117	482.592	203.97
3.04452	64	134	464.221	179.97
3.26002	70	145	525.55	212.41
4.9258	81	99	411.3	76.4
3.13549	67	158	571.25	171.34
3.43076	79	136	587.428	186.55
3.46574	69	109	558.728	202.62
3.4012	70	96	555.712	186.27
3.63759	82	102	440.091	200.2
3.58074	67	147	467.968	81.79
3.55535	78	100	419.215	193.62
3.7612	70	107	553.884	293.63
3.66356	63	127	550.228	307
3.045	61	121	572.621	206.1
2.70805	72	133	531.034	145.69
3.09104	60	106	594.214	358.12
3.53281	62	108	548.4	134.2
3.29584	66	150	552.97	145.25
3.4012	69	135	549.314	151.77
3.3322	75	84	548.4	127.66
3.43399	76	96	371.998	170.8
3.3569	84	122	388.45	114.5
3.29584	78	108	308.932	313.24
4.01836	84	108	255.006	98.61
4.32015	81	123	390.735	31.55
3.78805	81	90	386.924	143.74
3.91202	84	90	332.084	83.15
3.97029	93	109	389.912	219.3
5.0876	90	93	333.61	32.53
4.10923	89	86	390.278	50
3.68888	86	89	363.498	91.55
3.74809	88	106	332.394	33.5
3.94313	71	115	473.452	358.08

## Sheet: Animal Naming
Animal_Naming	age	race_w	race_a	race_af	education_class	Max__recorded_HR_during_6MWT__bp	_6MWT_m	PASE
20	91	1	0	0	1	109	415.87	208
18	83	0	1	0	0	112	415.87	167
10	91	0	1	0	0	99	399.875	182
16	76	1	0	0	1	105	374.74	121
21	63	0	0	1	0	88	319.9	108
19	75	0	0	1	0	109	485.334	141
18	88	1	0	0	1	127	414.042	125
11	95	0	1	0	0	85	374.74	84
19	71	0	0	0	0	115	450.145	232.76
7	88	1	0	0	0	87	406.73	168.4
22	74	1	0	0	0	122	534.69	172
10	88	1	0	0	0	89	287.91	51
20	66	1	0	0	1	152	536.061	235
10	91	0	1	0	0	103	297.05	106
19	72	0	0	0	0	142	520.98	226.33
20	78	0	0	0	0	103	439.634	173
18	76	1	0	0	1	148	470.71	233
20	77	1	0	0	0	88	548.4	136
22	70	1	0	0	0	110	462.484	149.03
11	69	1	0	0	0	97	285.168	93
22	85	1	0	0	1	97	313.045	204
18	71	1	0	0	0	119	462.484	350.63
12	73	0	1	0	1	112	511.84	131.8
15	61	0	1	0	1	119	413.128	126.73
16	64	1	0	0	1	110	437.806	118.7
17	73	0	1	0	1	120	558.911	234.37
13	73	0	1	0	1	100	427.112	75.12
19	73	0	1	0	1	121	514.125	41.1
16	73	0	0	0	0	120	443.29	133.9
11	79	0	1	0	0	83	374.74	195.65
13	91	0	1	0	1	138	260.49	38.25
18	87	0	1	0	1	120	443.29	325.7
14	93	1	0	0	0	129	333.61	61.1
17	61	0	1	0	1	148	543.83	139.25
17	62	1	0	0	0	146	554.798	277.01
14	66	1	0	0	0	162	578.562	147.81
19	60	1	0	0	1	151	577.648	33.6
11	81	0	0	0	0	130	468.882	151.71
13	66	0	0	1	0	106	367.126	83.46
15	77	1	0	0	0	122	523.265	244.99
22	61	0	0	1	0	130	543.83	226.94
14	61	0	1	0	0	127	506.356	138.5
22	65	0	0	0	1	133	460.656	330.151
11	74	0	1	0	1	113	477.839	63.7
18	63	0	0	1	1	149	572.164	212.85
12	80	1	0	0	0	103	489.904	228.32
15	82	1	0	0	0	85	279.684	110.7
14	64	0	0	1	1	115	504.528	85.8
16	70	0	1	0	1	144	550.776	199.19
18	77	1	0	0	1	135	505.99	210.48
21	66	0	0	1	1	133	504.528	131.06
22	80	1	0	0	1	139	560.282	168.12
21	71	1	0	0	1	99	554.798	131.52
15	77	0	1	0	1	108	320.814	157.25
22	70	1	0	0	1	117	482.592	203.97
22	64	1	0	0	1	134	464.221	179.97
21	70	1	0	0	1	145	525.55	212.41
12	81	1	0	0	0	99	411.3	76.4
17	67	0	0	0	1	158	571.25	171.34
20	79	1	0	0	1	136	587.428	186.55
15	69	1	0	0	0	109	558.728	202.62
22	70	1	0	0	1	96	555.712	186.27
22	82	1	0	0	0	102	440.091	200.2
8	67	1	0	0	0	147	467.968	81.79
17	78	1	0	0	0	100	419.215	193.62
21	70	1	0	0	1	107	553.884	293.63
22	63	1	0	0	1	127	550.228	307
20	61	1	0	0	1	121	572.621	206.1
22	72	1	0	0	1	133	531.034	145.69
20	60	1	0	0	0	106	594.214	358.12
15	62	1	0	0	1	108	548.4	134.2
20	66	0	1	0	1	150	552.97	145.25
22	69	1	0	0	1	135	549.314	151.77
19	75	1	0	0	1	84	548.4	127.66
22	66	1	0	0	1	111	558.454	224.62
20	76	0	0	1	0	96	371.998	170.8
18	76	0	0	1	0	138	354.33	52.2
15	84	0	0	1	0	122	388.45	114.5
22	78	0	0	1	0	108	308.932	313.24
10	88	0	0	1	0	99	310.029	181.31
20	84	1	0	0	0	108	255.006	98.61
12	81	0	0	0	0	123	390.735	31.55
14	81	1	0	0	0	90	386.924	143.74
10	84	1	0	0	1	90	332.084	83.15
16	93	1	0	0	0	109	389.912	219.3
16	90	1	0	0	0	93	333.61	32.53
13	89	1	0	0	1	86	390.278	50
20	86	1	0	0	0	89	363.498	91.55
18	88	1	0	0	0	106	332.394	33.5
15	71	1	0	0	1	115	473.452	358.08

## Sheet: Rank 3MS
R_3MS	age	race_w	Max__recorded_HR_during_6MWT__bp	_6MWT_m	PASE
52	91	1	109	415.87	208
65.5	83	0	112	415.87	167
5.5	91	0	99	399.875	182
37.5	76	1	105	374.74	121
37.5	63	0	88	319.9	108
37.5	75	0	109	485.334	141
17	88	1	127	414.042	125
5.5	95	0	85	374.74	84
10	71	0	115	450.145	232.76
19	88	1	87	406.73	168.4
44.5	74	1	122	534.69	172
8	88	1	89	287.91	51
87	66	1	152	536.061	235
12.5	91	0	103	297.05	106
14.5	72	0	142	520.98	226.33
3	78	0	103	439.634	173
58.5	76	1	148	470.71	233
10	77	1	88	548.4	136
27.5	70	1	110	462.484	149.03
23.5	69	1	97	285.168	93
65.5	85	1	97	313.045	204
17	71	1	119	462.484	350.63
31.5	73	0	112	511.84	131.8
52	61	0	119	413.128	126.73
65.5	64	1	110	437.806	118.7
31.5	73	0	120	558.911	234.37
20.5	73	0	100	427.112	75.12
44.5	73	0	121	514.125	41.1
1	73	0	120	443.29	133.9
2	79	0	83	374.74	195.65
10	91	0	138	260.49	38.25
77.5	87	0	120	443.29	325.7
44.5	93	1	129	333.61	61.1
77.5	61	0	148	543.83	139.25
58.5	62	1	146	554.798	277.01
77.5	66	1	162	578.562	147.81
87	60	1	151	577.648	33.6
5.5	81	0	130	468.882	151.71
12.5	66	0	106	367.126	83.46
23.5	77	1	122	523.265	244.99
37.5	61	0	130	543.83	226.94
27.5	61	0	127	506.356	138.5
44.5	65	0	133	460.656	330.151
27.5	74	0	113	477.839	63.7
27.5	63	0	149	572.164	212.85
31.5	80	1	103	489.904	228.32
65.5	82	1	85	279.684	110.7
37.5	64	0	115	504.528	85.8
65.5	70	0	144	550.776	199.19
58.5	77	1	135	505.99	210.48
5.5	66	0	133	504.528	131.06
77.5	80	1	139	560.282	168.12
37.5	71	1	99	554.798	131.52
65.5	77	0	108	320.814	157.25
87	70	1	117	482.592	203.97
77.5	64	1	134	464.221	179.97
52	70	1	145	525.55	212.41
37.5	81	1	99	411.3	76.4
23.5	67	0	158	571.25	171.34
77.5	79	1	136	587.428	186.55
65.5	69	1	109	558.728	202.62
77.5	70	1	96	555.712	186.27
52	82	1	102	440.091	200.2
65.5	67	1	147	467.968	81.79
14.5	78	1	100	419.215	193.62
58.5	70	1	107	553.884	293.63
77.5	63	1	127	550.228	307
87	61	1	121	572.621	206.1
77.5	72	1	133	531.034	145.69
65.5	60	1	106	594.214	358.12
87	62	1	108	548.4	134.2
77.5	66	0	150	552.97	145.25
77.5	69	1	135	549.314	151.77
77.5	75	1	84	548.4	127.66
77.5	66	1	111	558.454	224.62
44.5	76	0	96	371.998	170.8
52	76	0	138	354.33	52.2
65.5	84	0	122	388.45	114.5
31.5	78	0	108	308.932	313.24
52	84	1	108	255.006	98.61
17	81	0	123	390.735	31.55
44.5	81	1	90	386.924	143.74
20.5	84	1	90	332.084	83.15
23.5	93	1	109	389.912	219.3
52	90	1	93	333.61	32.53
52	89	1	86	390.278	50
52	86	1	89	363.498	91.55
37.5	88	1	106	332.394	33.5
77.5	71	1	115	473.452	358.08

## Sheet: B-blocker
Animal_Naming	age	race_w	race_a	race_af	education_class	Max__recorded_HR_during_6MWT__bp	_6MWT_m	PASE	B-blocker
20	91	1	0	0	1	109	415.87	208	1
18	83	0	1	0	0	112	415.87	167	1
10	91	0	1	0	0	99	399.875	182	1
16	76	1	0	0	1	105	374.74	121	1
21	63	0	0	1	0	88	319.9	108	1
19	75	0	0	1	0	109	485.334	141	0
18	88	1	0	0	1	127	414.042	125	0
11	95	0	1	0	0	85	374.74	84	1
19	71	0	0	0	0	115	450.145	232.76	1
7	88	1	0	0	0	87	406.73	168.4	1
22	74	1	0	0	0	122	534.69	172	0
10	88	1	0	0	0	89	287.91	51	1
20	66	1	0	0	1	152	536.061	235	0
10	91	0	1	0	0	103	297.05	106	0
19	72	0	0	0	0	142	520.98	226.33	0
20	78	0	0	0	0	103	439.634	173	0
18	76	1	0	0	1	148	470.71	233	0
20	77	1	0	0	0	88	548.4	136	1
22	70	1	0	0	0	110	462.484	149.03	0
11	69	1	0	0	0	97	285.168	93	1
22	85	1	0	0	1	97	313.045	204	0
18	71	1	0	0	0	119	462.484	350.63	0
12	73	0	1	0	1	112	511.84	131.8	0
15	61	0	1	0	1	119	413.128	126.73	0
16	64	1	0	0	1	110	437.806	118.7	0
17	73	0	1	0	1	120	558.911	234.37	0
13	73	0	1	0	1	100	427.112	75.12	0
19	73	0	1	0	1	121	514.125	41.1	0
16	73	0	0	0	0	120	443.29	133.9	0
11	79	0	1	0	0	83	374.74	195.65	1
13	91	0	1	0	1	138	260.49	38.25	0
18	87	0	1	0	1	120	443.29	325.7	0
14	93	1	0	0	0	129	333.61	61.1	0
17	61	0	1	0	1	148	543.83	139.25	0
17	62	1	0	0	0	146	554.798	277.01	0
14	66	1	0	0	0	162	578.562	147.81	0
19	60	1	0	0	1	151	577.648	33.6	0
11	81	0	0	0	0	130	468.882	151.71	1
13	66	0	0	1	0	106	367.126	83.46	0
15	77	1	0	0	0	122	523.265	244.99	0
22	61	0	0	1	0	130	543.83	226.94	0
14	61	0	1	0	0	127	506.356	138.5	0
22	65	0	0	0	1	133	460.656	330.151	0
11	74	0	1	0	1	113	477.839	63.7	0
18	63	0	0	1	1	149	572.164	212.85	0
12	80	1	0	0	0	103	489.904	228.32	0
15	82	1	0	0	0	85	279.684	110.7	1
14	64	0	0	1	1	115	504.528	85.8	0
16	70	0	1	0	1	144	550.776	199.19	0
18	77	1	0	0	1	135	505.99	210.48	0
21	66	0	0	1	1	133	504.528	131.06	0
22	80	1	0	0	1	139	560.282	168.12	0
21	71	1	0	0	1	99	554.798	131.52	0
15	77	0	1	0	1	108	320.814	157.25	0
22	70	1	0	0	1	117	482.592	203.97	0
22	64	1	0	0	1	134	464.221	179.97	0
21	70	1	0	0	1	145	525.55	212.41	0
12	81	1	0	0	0	99	411.3	76.4	0
17	67	0	0	0	1	158	571.25	171.34	0
20	79	1	0	0	1	136	587.428	186.55	0
15	69	1	0	0	0	109	558.728	202.62	0
22	70	1	0	0	1	96	555.712	186.27	0
22	82	1	0	0	0	102	440.091	200.2	0
8	67	1	0	0	0	147	467.968	81.79	0
17	78	1	0	0	0	100	419.215	193.62	0
21	70	1	0	0	1	107	553.884	293.63	0
22	63	1	0	0	1	127	550.228	307	0
20	61	1	0	0	1	121	572.621	206.1	0
22	72	1	0	0	1	133	531.034	145.69	0
20	60	1	0	0	0	106	594.214	358.12	0
15	62	1	0	0	1	108	548.4	134.2	0
20	66	0	1	0	1	150	552.97	145.25	0
22	69	1	0	0	1	135	549.314	151.77	0
19	75	1	0	0	1	84	548.4	127.66	0
22	66	1	0	0	1	111	558.454	224.62	0
20	76	0	0	1	0	96	371.998	170.8	0
18	76	0	0	1	0	138	354.33	52.2	0
15	84	0	0	1	0	122	388.45	114.5	1
22	78	0	0	1	0	108	308.932	313.24	0
10	88	0	0	1	0	99	310.029	181.31	0
20	84	1	0	0	0	108	255.006	98.61	0
12	81	0	0	0	0	123	390.735	31.55	0
14	81	1	0	0	0	90	386.924	143.74	0
10	84	1	0	0	1	90	332.084	83.15	1
16	93	1	0	0	0	109	389.912	219.3	0
16	90	1	0	0	0	93	333.61	32.53	0
13	89	1	0	0	1	86	390.278	50	0
20	86	1	0	0	0	89	363.498	91.55	0
18	88	1	0	0	0	106	332.394	33.5	0
15	71	1	0	0	1	115	473.452	358.08	0

## Sheet: DATA
A	sex	age (years)	Medication	ethnicity	education (yrs.)	height (cm)	height__m_	height__m2_	weight (kg)	BMI	waist (mm)	hip (mm)	waist_hip	Resting_HR (bpm)	Systolic__mmHg_	Diastolic__mmHg_	Max_Predicted_HR (bpm)	Max__recorded_HR_during_6MWT__bp (bmp)	_6MWT_yard	_6MWT_m	_normalized_to_height_6MWT	PASE	_3MS	_normalized_to_age_3MS	Animal_Naming	Trailmaking_A (s)	Trailmaking_B (s)	Peak_Hand_Grip_from_Trials__kg_	_normalized_to_kg_peak hand grip	Hand_Grip_peak1	Hand_Grip_peak2	Hand_Grip_peak3	Avg__Hand_Grip	Relative_grip_strength	Perceived_stress	peak_heart_rate (bpm)	normalized to resting HR_peak HR	VAR36	VAR37	VAR38	VAR39	VAR40	__Heart_rate_Recovery_min__1	__Heart_rate_Recovery_min__2	VAR43	C_reactive_Protein_Concentration	gender	peak_handgrip	relative_grip
1	M	91	betablockers, statin, other	1	16	170.5	1.705	2.90703	92.6	31.8539	110	111	0.990991	64	120	70	144.3	109	455	415.87	243.912	208	96	1.05495	20	34.82	153.8	16.510000000000002	0.178294	16.510000000000002	15.52	15.42	15.81666667	0.17829373650107994	26	109	1.70312	19	36	40	42	41	17.4312	33.0275	2	7.55	1	16.51	0.178
2	F	83	betablockers, statin, calcium channel blockers, other	4	14	160.9	1.609	2.58888	65.1	25.146	87	109	0.798165	78	122	100	149.9	112	455	415.87	258.465	167	98	1.18072	18	45	157	9.42	0.1447	9.42	8.6300000000000008	8.34	8.7966666670000002	0.14470046082949309	1	112	1.4359	17	22	23	32	31	15.1786	19.6429	3	8.4	0	9.42	0.144
3	F	91	betablockers, statin,other	4	13	144.5	1.445	2.08803	43.4	20.7852	69	92	0.75	65	130	70	144.3	99	437.5	399.875	276.73	182	78	0.857143	10	30.53	121.84	8.3000000000000007	0.191244	7.53	8.3000000000000007	7.64	7.8233333329999999	0.19124423963133644	26	99	1.52308	20	21	26	28	31	20.202	21.2121	5	0.56999999999999995	0	8.3	0.191
4	F	76	betablockers, statin, other	1	18	166.5	1.665	2.77223	89.2	32.1763	85	116	0.732759	61	125	70	154.8	105	410	374.74	225.069	121	94	1.23684	16	49	58	14.32	0.160538	12.45	12.82	14.32	13.196666670000001	0.16053811659192824	4	105	1.72131	24	35	39	39	39	22.8571	33.3333	4	6.57	0	14.32	0.16
5	F	63	betablockers, statin, vasodilators, calcium channel blockers, other	2	12	163.5	1.635	2.67322	90	33.6672	97	123	0.788618	48	150	80	163.9	88	350	319.9	195.657	108	94	1.49206	21	26.6	77	18.47	0.205222	18.399999999999999	18.47	18.03	18.3	0.20522222222222222	12	88	1.83333	25	30	33	32	31	28.4091	34.0909	6	<0.1	0	18.47	0.205
6	F	75	calcium channel blockers, other	2	13.5	154.9	1.549	2.3994	61.1	25.4647	80	101	0.792079	59	130	60	156.2	109	531	485.334	313.321	141	94	1.25333	19	40.9	128	18.850000000000001	0.308511	18.850000000000001	17.37	10.9	15.706666670000001	0.30851063829787234	14	109	1.84746	22	37	39	33	35	20.1835	33.945	1	2.25	0	18.85	0.308
7	F	88	calcium channel blockers, other	1	16	150.5	1.505	2.26502	44.1	19.47	65	88	0.738636	73	130	62	146.4	127	453	414.042	275.111	125	86	0.977273	18	28	53	6.47	0.146712	6.1	6.17	6.47	6.2466666670000004	0.14671201814058957	19	127	1.73973	40	45	47	48	50	31.4961	35.4331	2	1.74	0	6.47	0.146
8	F	95	betablockers,statin, calcium channel blockers, other	4	12	137.2	1.372	1.88238	37.2	19.7622	82.5	85.5	0.964912	65	112	65	141.5	85	410	374.74	273.134	84	78	0.821053	11	90	150	10.039999999999999	0.269892	8.9600000000000009	9.23	10.039999999999999	9.41	0.26989247311827952	12	85	1.30769	14	15	20	21	20	16.4706	17.6471	5	<0.1	0	10.04	0.269
9	F	71	betablockers, statin, other	6	14	147	1.47	2.1609	54.9	25.4061	77.47	95.25	0.813333	66	124	70	158.3	115	492.5	450.145	306.221	232.76	81	1.14085	19	19.14	57.16	15.17	0.276321	15.17	13.41	13.55	14.04	0.27632058287795991	28	115	1.74242	25	35	38	33	42	21.7391	30.4348	7	8.8699999999999992	0	15.17	0.276
11	M	88	betablockers, statin	1	12	168.2	1.682	2.82912	67.7	23.9297	92	103	0.893204	55	140	68	146.4	87	445	406.73	241.813	168.4	87	0.988636	7	41	128	22.83	0.337223	22.83	20.73	19.34	20.97	0.33722304283604132	23	87	1.58182	18	26	28	27	31	20.6897	29.8851	4	1	1	22.83	0.337
12	F	74	statin	1	12	167.9	1.679	2.81904	68	24.1217	91.5	105	0.871429	61	130	70	156.2	122	585	534.69	318.457	172	95	1.28378	22	31	280	19.739999999999998	0.290294	18.28	19.18	19.739999999999998	19.07	0.29029411764705881	9	122	2	33	43	43	49	50	27.0492	35.2459	3	10.53	0	19.74	0.29
13	F	88	betablockers, statin,calcium channel blockers, other	1	12	158.5	1.585	2.51222	50.1	19.9425	59.69	92.71	0.643836	59	150	92	146	89	315	287.91	181.647	51	79	0.897727	10	38	140	5.91	0.117964	5.56	5.89	5.91	5.79	0.11796407185628742	20	89	1.50847	31	36	34	35	36	34.8315	40.4494	3	1.22	0	5.91	0.117
14	F	66	none	1	16	167.5	1.675	2.80563	68.4	24.3796	91.5	99.1	0.92331	92	130	78	161.8	152	586.5	536.061	320.036	235	100	1.51515	20	25	106	15.47	0.22617	10.69	13.27	15.47	13.14	0.22616959064327485	13	152	1.65217	31	46	48	56	58	20.3947	30.2632	5	7.24	0	15.47	0.226
15	F	91	none	4	12	146	1.46	2.1316	55.1	25.8491	96	99	0.969697	77	130	80	144.3	103	325	297.05	203.459	106	82	0.901099	10	51	107	8.7899999999999991	0.159528	7.67	8.7899999999999991	8.68	8.3800000000000008	0.15952813067150634		103	1.33766	18	28	32	30	35	17.4757	27.1845	4	8.89	0	8.79	0.159
16	F	72	other	7	12	161.9	1.619	2.62116	76.4	29.1474	94	104	0.903846	63	102	60	157.6	142	570	520.98	321.791	226.33	85	1.18056	19	58	128	17.46	0.228534	15.66	17.46	16.41	16.510000000000002	0.22853403141361256	27	142	2.25397	29	44	45	47	52	20.4225	30.9859	9	2.84	0	17.46	0.228
17	M	78	other	7	6	170.6	1.706	2.91044	97.1	33.3627	114	112	1.01786	64	142	80	153.4	103	481	439.634	257.699	173	74	0.948718	20	120	280	13.95	0.143666	13.95	12.57	12.73	13.08333333	0.14366632337796087	19	103	1.60938	18	27	30	32	31	17.4757	26.2136	7	11.26	1	13.95	0.143
18	F	76	statin, other	1	16	173.5	1.735	3.01023	77.8	25.8452	80	110	0.727273	79	134	82	154.8	148	515	470.71	271.303	233	97	1.27632	18	26.6	58.02	12.78	0.164267	12.78	12.57	11.63	12.32666667	0.16426735218508998	11	148	1.87342	28	28	56	56	58	18.9189	18.9189	6	4.29	0	12.78	0.164
19	M	77	betablockers, statin, calcium channel blockers, other	1	15	196.5	1.965	3.86123	103.5	26.805	106	108	0.981481	64	112	86	154.1	88	600	548.4	279.084	136	81	1.05195	20	22.2	129.8	34.08	0.329275	33.81	34.08	29.87	32.58666667	0.32927536231884058	4	88	1.375	6	12	9	15	9	6.81818	13.6364	4	1.03	1	34.08	0.329
20	F	70	statin, other	1	14	162.5	1.625	2.64062	75.3	28.516	96	110	0.872727	64	130	80	159	110	506	462.484	284.606	149.03	92	1.31429	22	22.18	75	15.22	0.202125	15.22	12.86	11.99	13.356666669999999	0.20212483399734396	2	110	1.71875	32	40	42	43	42	29.0909	36.3636	3	1.2	0	15.22	0.202
21	F	69	betablockers, statin, calcium channel blockers, other	1	12	164.5	1.645	2.70602	142.2	52.5494	145	142	1.02113	79	140	82	158.2	97	312	285.168	173.354	93	90	1.30435	11	37.92	81	15.913	0.111906	15.913	15.172000000000001	15.08	15.38833333	0.1119057665260197	20	97	1.22785	7	13	16	20	21	7.21649	13.4021	7	7.39	0	15.913	0.111
22	F	85	calcium channel blockers, other	1	16	166.1	1.661	2.75892	92.1	33.3826	108	97.5	1.10769	69	152	74	148.5	97	342.5	313.045	188.468	204	98	1.15294	22	25	85	13.43	0.14582	12.08	13.17	13.43	12.893333330000001	0.14581976112920739	11	97	1.4058	15	23	23	23	23	15.4639	23.7113	6	9.8800000000000008	0	13.43	0.145
23	F	71	other	1	12	152.5	1.525	2.32562	51	21.9296	85	93	0.913978	73	152	88	158.2	119	506	462.484	303.268	350.63	86	1.21127	18	41	80	--		--	--	--	--	--	12	119	1.63014	34	40	41	41	41	28.5714	33.6134	1	1.42	0
24	F	73	none	4	16	157	1.57	2.4649	56.3	22.8407	79	92.7	0.852211	61	172	90	156.9	112	560	511.84	326.013	131.8	93	1.27397	12	23	50	15.88	0.28206	15.77	15.88	15.55	15.733333333333334	0.28206039076376554	44	112	1.83607	34	43	44	47	47	30.3571	38.3929	2	0.23200000000000001	0	15.88	0.282
25	F	61	none	4	16	143.25	1.4325	2.05206	42.7	20.8084	65.8	86.2	0.763341	73	122	72	165.3	119	452	413.128	288.397	126.73	96	1.57377	15	46.57	50.21	5.44	0.1274	4.58	5.14	5.44	5.0533333333333337	0.12740046838407496	29	119	1.63014	40	46	48	47	47	33.6134	38.6555	3	-----	0	5.44	0.127
26	M	64	other	1	16	169	1.69	2.8561	80.5	28.1853	96	110	0.872727	74	110	70	163.2	110	479	437.806	259.057	118.7	98	1.53125	16	30	43	16.63	0.206584	16.63	14.44	15.24	15.436666666666667	0.206583850931677	44	110	1.48649	32	35	35	36	35	29.0909	31.8182	5	1.444	1	16.63	0.206
27	M	73	statin	4	25	176.5	1.765	3.11522	83	26.6433	94	105	0.895238	66	122	82	156.9	120	611.5	558.911	316.663	234.37	93	1.27397	17	42	86	21.93	0.264217	19.79	21.93	21.66	21.126666666666665	0.26421686746987949	43	120	1.81818	22	37	38	42	44	18.3333	30.8333	3	2.76	1	21.93	0.264
28	F	73	other	4	16	162	1.62	2.6244	51.1	19.4711	74	90	0.822222	62			156.9	100	467.3	427.112	263.65	75.12	88	1.20548	13	33	134	15.62	0.305675	15.62	15.24	15.11	15.323333333333332	0.30567514677103713	26	100	1.6129	24	33	36	35	35	24	33	3	3.28	0	15.62	0.305
29	M	73	other	4	20	169	1.69	2.8561	65.1	22.7933	86	96	0.895833	76	152	94	156.9	121	562.5	514.125	304.216	41.1	95	1.30137	19	34	119	14.88	0.228571	14.88	12.63	12.18	13.229999999999999	0.22857142857142859	37	121	1.59211	26	32	33	34	35	21.4876	26.4463	3	2.0329999999999999	1	14.88	0.228
30	F	73	other	7	6	159	1.59	2.5281	63.9	25.2759	88	108	0.814815	88	132	82	156.9	120	485	443.29	278.799	133.9	64	0.876712	16	41.79	156	13.07896	0.204679	11.753629999999999	13.07896	11.85826	12.230283333333333	0.20467856025039124	26	120	1.36364	43	48	49	49	47	35.8333	40	3	11.829000000000001	0	13.079	0.204
31	M	79	betablockers,statin, calcium channel blockers, other	4	12	153	1.53	2.3409	62.4	26.6564	94	99	0.949495	96	172	101	152.7	83	410	374.74	244.928	195.65	69	0.873418	11	55	180	14.334540000000001	0.22972	13.637	14.334540000000001	13.42773	13.799756666666667	0.22972019230769233	37	83	0.864583	23	29	29	28	29	27.7108	34.9398	2	----	1	14.3345	0.229
32	M	91	statin,calcium channel blockers, other	4	19	165.8	1.658	2.74896	54.4	19.7893	89	98	0.908163	95	152	78	144.3	138	285	260.49	157.111	38.25	81	0.89011	13	37	54.42	16.339980000000001	0.300367	16.339980000000001	15.76451	15.83426	15.979583333333332	0.30036727941176472	56	138	1.45263	19	31	34	39	40	13.7681	22.4638	8	9.2479999999999993	1	16.34	0.3
33	F	87	statin, other	4	20	150	1.5	2.25	45.3	20.1333	76	90	0.844444	86	132	62	147.1	120	485	443.29	295.527	325.7	99	1.13793	18	17	90	9.5563599999999997	0.210957	9.5563599999999997	9.0332000000000008	9.0506399999999996	9.2134	0.21095717439293599	22	120	1.39535	32	43	47	51	52	26.6667	35.8333	1	<0.1	0	9.55636	0.21
34	F	93	other	1	12	163.3	1.633	2.66669	50.2	18.8248	72.5	92	0.788043	101	172	74	142.9	129	365	333.61	204.293	61.1	95	1.02151	14	29	64			None taken	None taken	None taken	None taken		39	129	1.27723	19	24	32	35	40	14.7287	18.6047	6	7.7130000000000001	0
35	F	61	other	4	16	157.5	1.575	2.48062	52.5	21.164	83.4	86.5	0.964162	68	110	78	165.3	148	595	543.83	345.289	139.25	99	1.62295	17	31	50.4	11.52693	0.219561	11.05608	11.52693	10.899139999999999	11.160716666666668	0.21956057142857144	22	148	2.17647	38	50	57	56	61	25.6757	33.7838	3	2.4830000000000001	0	11.5269	0.219
36	F	62	other	1	14	162.6	1.626	2.64388	92.5	34.9865	111	123	0.902439	73	134	86	164.6	146	607	554.798	341.204	277.01	97	1.56452	17	21	35	15.22391	0.164583	14.82282	14.997210000000001	15.22391	15.014646666666669	0.1645828108108108	20	146	2	43	57	59	60	59	29.4521	39.0411	8	9.4450000000000003	0	15.2239	0.164
37	F	66	other	1	14	155	1.55	2.4025	65.2	27.1384	82	116.5	0.703863	77	152	82	161.8	162	633	578.562	373.266	147.81	99	1.5	14	30.52	47.39	11.247909999999999	0.172514	11.12584	11.247909999999999	11.23047	11.201406666666665	0.17251395705521472	16	162	2.1039	40	61	69	70	60	24.6914	37.6543	7	3.5110000000000001	0	11.2479	0.172
38	M	60	statin, other	1	16	171	1.71	2.9241	91.6	31.3259	105	115	0.913043	68	118	76	166	151	632	577.648	337.806	33.6	100	1.66667	19	26	70	41.06794	0.44834	35.400390000000002	41.06794	38.574219999999997	38.347516666666671	0.44833995633187773	10	151	2.22059	40	52	58	60	64	26.4901	34.4371	8	<0.1	1	41.0679	0.448
39	F	81	betablockers	7	15	158	1.58	2.4964	67.8	27.1591	103	104	0.990385	85	142	64	151.3	130	513	468.882	296.761	151.71	78	0.962963	11	29	60	11.771000000000001	0.173614	10.393000000000001	11.771000000000001	10.236000000000001	10.800000000000002	0.17361356932153393	22	130	1.52941	33	43	43	46	45	25.3846	33.0769	9	25.196999999999999	0	11.771	0.173
40	F	66	other	2	11	158	1.58	2.4964	89	35.6513	102	117	0.871795	76	144	104	161.8	106	401.67	367.126	232.358	83.46	82	1.24242	13	46	155	13.567	0.152438	13.567	11.77	11.993	12.443333333333333	0.15243820224719101	22	106	1.39474	15	23	21	19	21	14.1509	21.6981	5	3.1240000000000001	0	13.567	0.152
41	F	77	statin, calcium channel blockers,other	1	12	158	1.58	2.4964	68.5	27.4395	87.5	115	0.76087	75	124	76	154.1	122	572.5	523.265	331.18	244.99	90	1.16883	15	30	98	15.433	0.225299	14.125	14.84	15.433	14.799333333333331	0.22529927007299269	4	122	1.62667	42	47	50	51	47	34.4262	38.5246	2	2.9510000000000001	0	15.433	0.225
42	F	61	none	2	14	165.5	1.655	2.73903	87.2	31.8361	103.5	115	0.9	73	118	84	165.3	130	595	543.83	328.598	226.94	94	1.54098	22	31	72	22.67	0.259977	22.67	21.797999999999998	21.76	22.076000000000004	0.25997706422018352	11	130	1.78082	33	43	47	47	45	25.3846	33.0769	3	7.9379999999999997	0	22.67	0.259
43	F	61	other	4	15	156.4	1.564	2.4461	58.9	24.0792	86	98	0.877551	74	118	78	165.3	127	554	506.356	323.757	138.5	92	1.5082	14	22.89	61	13.689	0.232411	10.776999999999999	11.98	13.689	12.148666666666665	0.23241086587436333	14	127	1.71622	24	32	33	34	38	18.8976	25.1969	5	1.0169999999999999	0	13.689	0.232
44	F	65	0	6	16	148.5	1.485	2.20523	84.8	38.4541	122	121	1.00826	95	148	78	162.5	133	504	460.656	310.206	330.151	95	1.46154	22	23.09	97.8	13.567	0.159988	12.555	13.567	13.218	13.113333333333335	0.15998820754716983	15	133	1.4	22	30	31	34	35	16.5414	22.5564	4	33.192	0	13.567	0.159
46	M	74	statin, other	4	20	171.5	1.715	2.94123	67.5	22.9496	96.5	99	0.974747	70	122	68	156.2	113	522.8	477.839	278.623	63.7	92	1.24324	11	53	253								21	113	1.61429	32	38	37	38	37	28.3186	33.6283	6		1
47	M	63	none	2	20	174.5	1.745	3.04503	98.5	32.3478	110	107	1.02804	75	138	84	163.9	149	626	572.164	327.888	212.85	92	1.46032	18	18	40	26.62	0.270254	24.39	26.62	25.42	25.47666666666667	0.27025380710659902	27	149	1.98667	19	35	34	38	42	12.7517	23.4899	5		1	26.62	0.27
48	F	80	statin	1	12	161.5	1.615	2.60823	65.1	24.9595	86	101	0.851485	61	138	82	152	103	536	489.904	303.346	228.32	93	1.1625	12	38.35	120.3	6.55	0.100614	6.03	5.77	6.55	6.1166666666666671	0.10061443932411675	15	103	1.68852	26	27	32	35	33	25.2427	26.2136	5		0	6.55	0.1
49	M	82	betablockers, other	1	14	176.3	1.763	3.10817	87.3	28.0873	112	113	0.99115	58	132	74	150.6	85	306	279.684	158.641	110.7	98	1.19512	15	57.5	132.4	6.57	0.0752577	6.57	6.34	6.13	6.3466666666666667	7.5257731958762897E-2	22	85	1.46552	22	27	27	27	27	25.8824	31.7647	10		1	6.57	7.525
50	F	64	none	2	19	167.7	1.677	2.81233	79.5	28.2684	97	115.1	0.842745	70	104	72	163.2	115	552	504.528	300.852	85.8	94	1.46875	14	44.4	67	11.3	0.142138	10.3	10.98	11.3	10.86	0.14213836477987421	13	115	1.64286	1	1	1	1	31	0.869565	0.869565	6		0	11.3	0.142
51	F	70	other	4	18	149	1.49	2.2201	47	21.1702	83	94	0.882979	63	142	82	159	144	602.6	550.776	369.649	199.19	98	1.4	16	32	60	4.55	0.0968085	4.55	4.4800000000000004	4.34	4.456666666666667	9.6808510638297873E-2	13	144	2.28571	49	56	57	53	55	34.0278	38.8889	4		0	4.55	9.68
52	F	77	statin, other	1	20	155.5	1.555	2.41802	60	24.8136	81	100	0.81	71			154.1	135	553.6	505.99	325.396	210.48	97	1.25974	18	20	80	6.29	0.104833	6.29	5.58	5.89	5.9200000000000008	0.10483333333333333	9	135	1.90141	47	57	58	58	58	34.8148	42.2222	4		0	6.29	0.104
53	F	66	other	2	16	157.4	1.574	2.47748	63.5	25.6309	81.5	95.3	0.855194	70	122	78	161.8	133	552	504.528	320.539	131.06	78	1.18182	21	30	86	8.68	0.136693	7.23	8.5399999999999991	8.68	8.15	0.13669291338582676	22	133	1.9	32	41	47	46	43	24.0602	30.8271	5		0	8.68	0.136
54	F	80	other	1	16	161	1.61	2.5921	53	20.4467	70.3	90.7	0.775083	84	142	70	152	139	613	560.282	348.001	168.12	99	1.2375	22	45.1	94	13.53	0.255283	12.52	13.46	13.53	13.17	0.25528301886792454	17	139	1.65476	25	35	43	45	46	17.9856	25.1799	5		0	13.53	0.255
55	M	71	statin	1	16	169	1.69	2.8561	60.8	21.2878	89	93	0.956989	57	130	70	158.3	99	607	554.798	328.283	131.52	94	1.32394	21	24	76	12.48	0.205263	11.64	12.01	12.48	12.043333333333331	0.20526315789473687	13	99	1.73684	39	32	30	38	43	39.3939	32.3232	3		1	12.48	0.205
56	F	77	none	4	20	146.5	1.465	2.14623	53.2	24.7877	83	94	0.882979	62	110	70	154.1	108	351	320.814	218.986	157.25	98	1.27273	15	40	86	8.2200000000000006	0.154511	8.1300000000000008	7.5	8.2200000000000006	7.95	0.15451127819548874	28	108	1.74194	26	42	47	42	46	24.0741	38.8889	8		0	8.22	0.154
57	F	70	none	1	16	166	1.66	2.7556	68.95	25.0218	93.5	105	0.890476	71	140	70	159	117	528	482.592	290.718	203.97	100	1.42857	22	43.4	94	17.149999999999999	0.248731	17.149999999999999	17.010000000000002	16.43	16.863333333333333	0.24873096446700504	20	117	1.64789	25	35	35	36	30	21.3675	29.9145	3		0	17.15	0.248
58	F	64	none	1	18	158.4	1.584	2.50906	53.9	21.4822	71.6	95.2	0.752101	61	136	72	143.3	134	507.9	464.221	293.069	179.97	99	1.54688	22	21	39	10.01	0.185714	9.0500000000000007	10.01	9.2200000000000006	9.4266666666666676	0.18571428571428572	12	134	2.19672	39	46	61	62	64	29.1045	34.3284	4		0	10.01	0.185
59	F	70	other	1	18	164.2	1.642	2.69616	46.61	17.2875	109.7	135.6	0.808997	93	132	72	159	145	575	525.55	320.067	212.41	96	1.37143	21	26.05	55.56	10.01	0.214761	9.0500000000000007	10.01	9.2200000000000006	9.4266666666666676	0.21476078094829434	14	145	1.55914	25	34	37	38	39	17.2414	23.4483	6		0	10.01	0.214
60	F	81	none	1	12	155.5	1.555	2.41802	70.4	29.1147	111	104	1.06731	54	130	76	151.3	99	450	411.3	264.502	76.4	94	1.16049	12	137.8	260.12	7.9	0.112216	7.9	6.59	5.96	6.8166666666666664	0.11221590909090909	28	99	1.83333	16	27	30	32	33	16.1616	27.2727	10		0	7.9	0.112
61	F	67	none	7	16	158	1.58	2.4964	47.4	18.9873	74	87	0.850575	56	140	75	161.1	158	625	571.25	361.551	171.34	90	1.34328	17	23	45	15.85	0.334388	14.3	15.85	14.33	14.826666666666666	0.33438818565400846	13	158	2.82143	59	78	79	80	81	37.3418	49.3671	6		0	15.85	0.334
62	M	79	statin, calcium channel blockers, other	1	18	173.3	1.733	3.00329	76.6	25.5054	102	104	0.980769	55	132	60	152.7	136	642.7	587.428	338.966	186.55	99	1.25316	20	30.9	44.5	20.9	0.272846	18.96	19.96	20.9	19.940000000000001	0.27284595300261094	16	136	2.47273	48	51	50	60	64	35.2941	37.5	5		1	20.9	0.272
63	F	69	none	1	13	168.5	1.685	2.83923	64.8	22.8231	82	96	0.854167	58	136	78	159.7	109	611.3	558.728	331.589	202.62	98	1.42029	15	32	59	15.12	0.233333	14.71	15.12	14.27	14.699999999999998	0.23333333333333334	18	109	1.87931	38	40	42	42	45	34.8624	36.6972	1		0	15.12	0.233
64	F	70	none	1	17	171.5	1.715	2.94123	59	20.0597	74	96	0.770833	58	140	70	159	96	608	555.712	324.03	186.27	99	1.41429	22	30	120	10.17	0.172373	10.17	9.18	8.1	9.15	0.17237288135593221	20	96	1.65517	28	29	33	34	31	29.1667	30.2083	5		0	10.17	0.172
65	F	82	statin, other	1	15	167.5	1.675	2.80563	81.4	29.0131	103	109	0.944954	67	126	70	150.6	102	481.5	440.091	262.741	200.2	96	1.17073	22	38	54	12.45	0.152948	12.05	11.63	12.45	12.043333333333331	0.15294840294840292	13	102	1.52239	21	19	32	21	30	20.5882	18.6275	9		0	12.45	0.152
66	F	67	statin, other	1	14	169.5	1.695	2.87303	70.7	24.6082	97.2	105	0.925714	70	130	70	161.1	147	512	467.968	276.087	81.79	98	1.46269	8	35.9	72	15.07	0.213154	14.82	15.07	14.96	14.950000000000001	0.21315417256011315	13	147	2.1	46	49	61	63	67	31.2925	33.3333	5		0	15.07	0.213
67	F	78	statin, calcium channel blockers, other	1	15	151	1.51	2.2801	65.4	28.683	98	105.5	0.92891	57	132	76	153.4	100	458.66	419.215	277.626	193.62	85	1.08974	17	35	215	10.6	0.16208	10.6	9.34	10.130000000000001	10.023333333333333	0.1620795107033639	25	100	1.75439	32	38	35	38	40	32	38	8		0	10.6	0.162
68	M	70	statin, other	1	18	178.5	1.785	3.18622	93.36	29.3011	101	106	0.95283	57	136	70	159	107	606	553.884	310.299	293.63	97	1.38571	21	43	95	24.86	0.266281	20.43	24.25	24.86	23.179999999999996	0.2662810625535561	16	107	1.87719	38	45	41	43	42	35.514	42.0561	5		1	24.86	0.266
69	F	63	other	1	20	156.3	1.563	2.44297	64.8	26.5251	84	106.8	0.786517	77	124	82	163.9	127	602	550.228	352.033	307	99	1.57143	22	39	78	9.67	0.149228	7.03	8.1199999999999992	9.67	8.2733333333333334	0.14922839506172841	12	127	1.64935	39	44	40	40	46	30.7087	34.6457	2		0	9.67	0.149
70	F	61	other	1	18	168	1.68	2.8224	73.8	26.148	90	112	0.803571	69	110	72	165.3	121	626.5	572.621	340.846	206.1	100	1.63934	20	21.01	44.9	6.05	0.0819783	3.45	4.53	6.05	4.6766666666666667	8.1978319783197834E-2	15	121	1.75362	42	48	47	43	46	34.7107	39.6694	6		0	6.05	8.197
71	F	72	other	1	17	163.1	1.631	2.66016	77.6	29.1712	92	106	0.867925	59	152	92	157.6	133	581	531.034	325.588	145.69	99	1.375	22	15	41	9.92	0.127835	9.92	8.3800000000000008	8.2799999999999994	8.86	0.12783505154639177	11	133	2.25424	26	53	56	53	36	19.5489	39.8496	5		0	9.92	0.127
72	F	60	other	1	13	161	1.61	2.5921	55.8	21.5269	75.5	92	0.820652	59	128	72	166	106	650.125	594.214	369.077	358.12	98	1.63333	20	22	43	7.77	0.139247	7.77	6.83	7.25	7.2833333333333341	0.13924731182795699	12	106	1.79661	40	40	37	37	37	37.7358	37.7358	2		0	7.77	0.139
73	F	62	other	1	16	160.9	1.609	2.58888	64.5	24.9142	75.5	103	0.73301	66	124	84	164.6	108	600	548.4	340.833	134.2	100	1.6129	15	34.22	64	10.16	0.157519	8.2799999999999994	9.5500000000000007	10.16	9.33	0.15751937984496125	18	108	1.63636	31	36	37	35	37	28.7037	33.3333	3		0	10.16	0.157
74	F	66	statin, other	4	16	154	1.54	2.3716	51.8	21.8418	81	90	0.9	66	130	80	161.8	150	605	552.97	359.071	145.25	99	1.5	20	27	77	8.3800000000000008	0.161776	6.58	7.65	8.3800000000000008	7.5366666666666662	0.1617760617760618	16	150	2.27273	33	39	51	60	62	22	26	1		0	8.38	0.161
75	M	69	other	1	19	189	1.89	3.5721	126	35.2734	120	120	1	62	132	68	159.7	135	601	549.314	290.642	151.77	99	1.43478	22	30	72	17.8	0.14127	16.48	17.8	17.47	17.25	0.14126984126984127		135	2.17742	41	50	57	61	58	30.3704	37.037	4		1	17.8	0.141
76	M	75	statin, other	1	20	174	1.74	3.0276	79.7	26.3245	90	99	0.909091	57	128	60	155.5	84	600	548.4	315.172	127.66	99	1.32	19	28	39	16.420000000000002	0.206023	14.84	16.420000000000002	14.96	15.406666666666666	0.20602258469259727	15	84	1.47368	9	9	22	25	26	10.7143	10.7143	3		1	16.42	0.206
77	F	66	other	1	16	176.53	1.7653	3.11628	70.9	22.7515	90.17	105.66	0.853398	74	108	68	161.8	111	611	558.454	316.351	224.62	99	1.5	22			9.9	0.139633	9.9	8.16	6.13	8.0633333333333344	0.13963328631875882	16	111	1.5	27	28	28	29	36	24.3243	25.2252	3		0	9.9	0.139
79	F	76	statin, other	2	14	164.1	1.641	2.69288	89.5	33.2358	123.1	120.3	1.02328	58	124	63	154.8	96	407	371.998	226.69	170.8	95	1.25	20	31	153	14.46	0.161564	13.58	13.57	14.46	13.87	0.16156424581005588	17	96	1.65517	25	33	34	25	28	26.0417	34.375	6		0	14.46	0.161
81	F	76	statin, calcium channel blockers, other	2	12	158	1.58	2.4964	72.2	28.9216	95.5	112	0.852679	63	124	68	154.8	138	387.67	354.33	224.26	52.2	96	1.26316	18		118	11.2	0.155125	11.2	9.31	9.48	9.9966666666666661	0.15512465373961218	27	138	2.19048	61	73	71	58	65	44.2029	52.8986	8		0	11.2	0.155
82	F	84	betablockers, vasodilators, other	2	15	152.5	1.525	2.32562	57	24.5095	81.5	97	0.840206	61	170	70	149.2	122	425	388.45	254.721	114.5	98	1.16667	15	28.7	57	11.88	0.208421	11.88	11.45	11.43	11.586666666666666	0.20842105263157895	8	122	2	30	37	50	50	58	24.5902	30.3279	6		0	11.88	0.208
83	F	78	statin, other	2	12	163	1.63	2.6569	76	28.6048				63	125	62	153.4	108	338	308.932	189.529	313.24	93	1.19231	22	27	137	13.21	0.173816	11.61	12.18	13.21	12.333333333333334	0.17381578947368423	15	108	1.71429	39	42	44	43	40	36.1111	38.8889	6		0	13.21	0.173
84	F	88	other	2	12	155	1.55	2.4025	60.5	25.1821	86.5	94	0.920213	57	148	82	146.4	99	339.2	310.029	200.019	181.31			10											99	1.73684	25	32	35	38	38	25.2525	32.3232	5		0
86	F	84	other	1	14	158.3	1.583	2.50589	81.4	32.4835	108	118	0.915254	68	98	54	149.2	108	279	255.006	161.09	98.61	96	1.14286	20	55.61	85.21	10	0.12285	8.5399999999999991	8.8699999999999992	10	9.1366666666666649	0.12285012285012284	12	108	1.58824	14	20	26	32	32	12.963	18.5185	3		0	10	0.122
87	M	81	statin, other	6	14	157.6	1.576	2.48378	65.8	26.4919	100	93.5	1.06952	90	124	70	145	123	427.5	390.735	247.928	31.55	86	1.06173	12	75.2	135.63	15.67	0.238146	14.61	14.61	15.67	14.96	0.23814589665653496	14	123	1.36667	12	19	15	23	24	9.7561	15.4472	9		1	15.67	0.238
88	F	81	other	1	12	160	1.6	2.56	73.91	28.8711	94	115	0.817391	50	130	80	151.3	90	423.33	386.924	241.827	143.74	95	1.17284	14	44.17	78	9.24	0.125017	9.1	9.24	7.93	8.76	0.12501691246110136	2	90	1.8	27	37	39	39	38	30	41.1111	4		0	9.24	0.125
89	F	84	betablockers, other	1	16	167.5	1.675	2.80563	69.2	24.6647	104	108	0.962963	64	125	78	149.2	90	363.33	332.084	198.259	83.15	88	1.04762	10	50	57	13.96	0.201734	13.7	13.53	13.96	13.73	0.20173410404624278	15	90	1.40625	14	18	21	20	18	15.5556	20	6		0	13.96	0.201
90	F	93	other	1	10	153	1.53	2.3409	46.1	19.6933	87	93	0.935484	72	135	80	142.9	109	426.6	389.912	254.845	219.3	90	0.967742	16	53	127	10.19	0.221041	10.09	10.19	9.84	10.039999999999999	0.22104121475054228	18	109	1.51389	17	34	35	40	41	15.5963	31.1927	4		0	10.19	0.221
91	F	90	statin, other	1	12	149.8	1.498	2.244	62.4	27.8074	90.25	110.8	0.814531	64	145	75	145	93	365	333.61	222.704	32.53	96	1.06667	16	162	200	9.9700000000000006	0.159776	9.9700000000000006	9.83	9.5299999999999994	9.7799999999999994	0.15977564102564104	21	93	1.45312	14	21	26	29	31	15.0538	22.5806	4		0	9.97	0.159
92	M	89	other	1	16	181.5	1.815	3.29422	76.3	23.1617	100	100	1	73	120	78	145.7	86	427	390.278	215.029	50	96	1.07865	13	60.9	76	20.2	0.264744	20.2	19.28	18.38	19.29	0.26474442988204455	10	86	1.17808	8	12	15	15	16	9.30233	13.9535	5		1	20.2	0.264
93	F	86	other	1	7	160.2	1.602	2.5664	63.4	24.7038	82	99	0.828283	72	130	80	147.8	89	397.7	363.498	226.902	91.55	96	1.11628	20	40	69	12.53	0.197634	11.59	12.53	11.33	11.82	0.19763406940063091	27	89	1.23611	12	10	13	18	12	13.4831	11.236	5		0	12.53	0.197
94	F	88	other	1	14	143.6	1.436	2.0621	73.86	35.8179	91	105	0.866667	71	140	78	146.4	106	363.67	332.394	231.472	33.5	94	1.06818	18	42.44	112.09	13.38	0.181154	13.38	12.54	13.14	13.02	0.18115353371242893	33	106	1.49296	22	32	32	35	33	20.7547	30.1887	5		0	13.38	0.181
95	M	71	other	1	18	176.5	1.765	3.11522	80.4	25.8087	88.2	101.6	0.86811		142	82	158.3	115	518	473.452	268.245	358.08	99	1.39437	15	51.58	79								26	115		27	29	20	24	23	23.4783	25.2174	3		1
			Medication legend
			0: none. 1: betablockers. 2:statin. 3: vasodilators. 4: calcium channel blockers 5: other
				Ethnicity legend
				1: white. 2: Asian. 3: African American. 4: Other
[truncated: 8 more columns]
